# Supplementary material for: MOFs-Derived Zn-Based Catalysts in Acetylene Acetoxylation
Source: MDPI journal article supplement (doi:10.3390/nano12010098), 2021-12-29
Supplement: s1 [file s1]

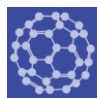

## Supplementary Materials

# MOFs-Derived Zn-Based Catalysts in Acetylene Acetoxylation

Mengli Li <sup>1</sup>, Zhuang Xu <sup>1</sup>, Yuhao Chen <sup>1</sup>, Guowang Shen <sup>1</sup>, Xugen Wang <sup>1,2,\*</sup> and Bin Dai <sup>1,2,\*</sup>

<sup>1</sup> School of Chemistry and Chemical Engineering, Shihezi University, Shihezi 832000, China; 20192007095@stu.shzu.edu.cn (M.L.); 20182007103@stu.shzu.edu.cn (Z.X.); chenYuhao@stu.shzu.edu.cn (Y.C.); 20202107050@stu.shzu.edu.cn (G.S.)

<sup>2</sup> Key Laboratory for Green Processing of Chemical Engineering of Xinjiang Bingtuan, Shihezi 832000, China

\* Correspondence: wxgen@shzu.edu.cn (X.W.); db\_tea@shzu.edu.cn (B.D.); Tel.: +86-993-2057270 (B.D.); Fax: +86-993-2057210 (B.D.)

## 1. Experimental section

### 1.1 2-MI-450, 2-MI-550

2-MI-550 was the same sample as Zn-N-C in the text. 2-MI-450 calcination temperature is 450 °C, other steps were the same as the Zn-N-C preparation method.

### 1.2. H<sub>2</sub>BDC-450, H<sub>2</sub>BDC(NH<sub>2</sub>)-450, H<sub>2</sub>BDC(NO<sub>2</sub>)-450, H<sub>2</sub>BDC-PD(5)-450, H<sub>2</sub>BDC-PD(13)-450

H<sub>2</sub>BDC-450 was the same sample as Zn-O-C in the main text. For H<sub>2</sub>BDC(NH<sub>2</sub>)-450, 0.63 g H<sub>2</sub>BDC was replaced by 0.4 g H<sub>2</sub>BDC and 0.23 g H<sub>2</sub>BDC(NH<sub>2</sub>), and the other steps were the same as the Zn-O-C preparation method. For H<sub>2</sub>BDC(NO<sub>2</sub>)-450, 0.63 g H<sub>2</sub>BDC was replaced by 0.4 g H<sub>2</sub>BDC and 0.23 g H<sub>2</sub>BDC(NO<sub>2</sub>), the other steps were the same as the preparation method of Zn-O-C. H<sub>2</sub>BDC-PD(5)-450, H<sub>2</sub>BDC-PD(13)-450 was added with 0.5 mL, 1.3 mL PD in the addition of Zn(NO<sub>3</sub>)<sub>2</sub>·6H<sub>2</sub>O and H<sub>2</sub>BDC solution after mixing well, the other steps were the same as the Zn-O-C preparation method.

### 1.3. H<sub>2</sub>BDC-TEDA-PD-450, H<sub>2</sub>BDC-TETA-PD-450

H<sub>2</sub>BDC-TEDA-PD-450 was the same sample as Zn-O/N-C in the main text. For H<sub>2</sub>BDC-TETA-PD-450, TEDA was replaced with TETA, the other steps were the same as the preparation method of Zn-O/N-C.

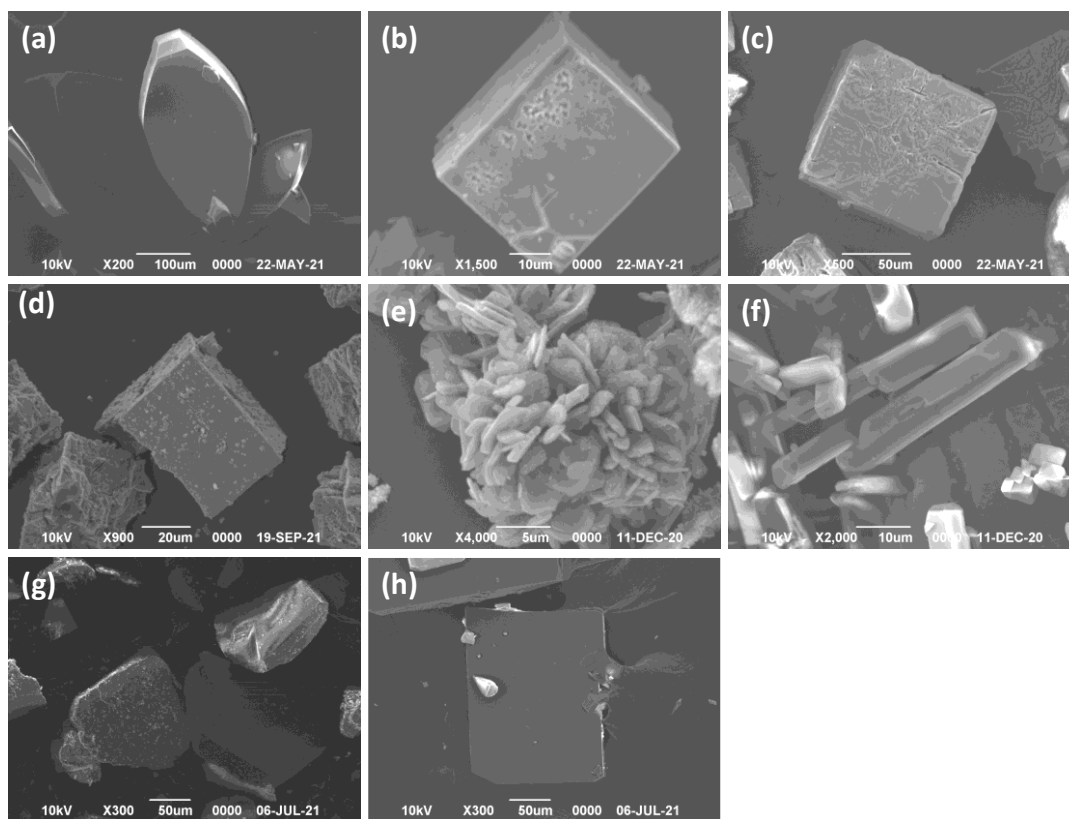

**Figure S1.** SEM of each substance 2-MI (a), H<sub>2</sub>BDC (b), H<sub>2</sub>BDC(NH<sub>2</sub>) (c), H<sub>2</sub>BDC(NO<sub>2</sub>) (d), H<sub>2</sub>BDC-TETA-PD (e), H<sub>2</sub>BDC-TEDA-PD (f), H<sub>2</sub>BDC-PD(5) (g), H<sub>2</sub>BDC-PD(13) (h). (For ease of differentiation, the catalyst in this picture was named after the added ligand.)

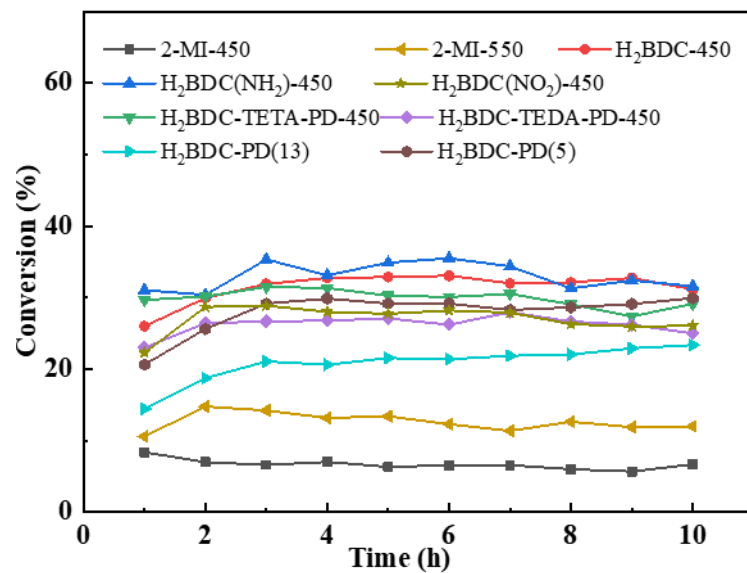

**Figure S2.** Reactivity of catalysts with time. (For ease of differentiation, the catalyst in this picture was named after the added ligand.)

**Table S1.** Specific surface area, pore volume, and pore size data of each substance.

| Samples                                  | $S_{\text{BET}}^a$ ( $\text{m}^2 \text{g}^{-1}$ ) | $V_{\text{meso}}^b$ ( $\text{cm}^3 \text{g}^{-1}$ ) | Dave $^c$ (nm) |
|------------------------------------------|---------------------------------------------------|-----------------------------------------------------|----------------|
| 2-MI-450                                 | 11.77                                             | 0.01                                                | 33.17          |
| 2-MI-550                                 | 331.10                                            | 0.10                                                | 15.97          |
| H <sub>2</sub> BDC-450                   | 301.40                                            | 0.33                                                | 6.26           |
| H <sub>2</sub> BDC(NH <sub>2</sub> )-450 | 338.65                                            | 0.58                                                | 6.66           |
| H <sub>2</sub> BDC(NO <sub>2</sub> )-450 | 426.88                                            | 0.59                                                | 6.96           |
| H <sub>2</sub> BDC-TEDA-PD-450           | 343.04                                            | 0.17                                                | 4.91           |
| H <sub>2</sub> BDC-TETA-PD-450           | 291.08                                            | 0.20                                                | 5.36           |
| H <sub>2</sub> BDC-PD(5)-450             | 345.15                                            | 0.26                                                | 6.37           |
| H <sub>2</sub> BDC-PD(13)-450            | 297.41                                            | 0.14                                                | 4.60           |

(For ease of differentiation, the catalyst in this picture was named after the added ligand.).

<sup>a</sup> The specific surface area ( $S_{\text{BET}}$ ) is obtained by the Brunauer-Emmer-Teller (BET) algorithm;

<sup>b</sup> The mesoporous pore volume ( $V_{\text{meso}}$ ) is calculated by the Barret-Joyner-Halenda (BJH) algorithm to calculate the desorption cumulative volume;

<sup>c</sup> The mesoporous pore size (Dave) is calculated by the Barret-Joyner-Halenda (BJH) algorithm to calculate the desorption average pore width.

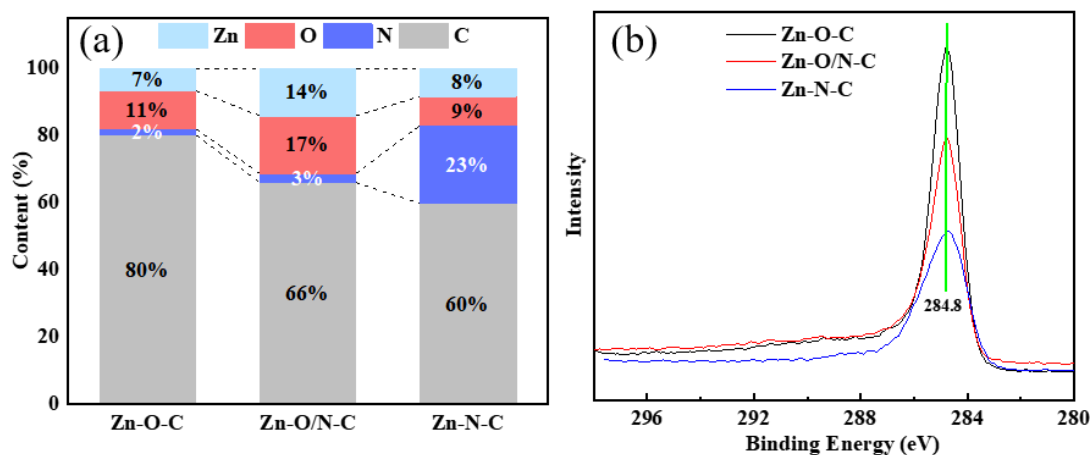**Figure S3.** XPS analysis of the contents of each element (a) and C 1s (b) of Zn-O-C, Zn-O/N-C and Zn-N-C.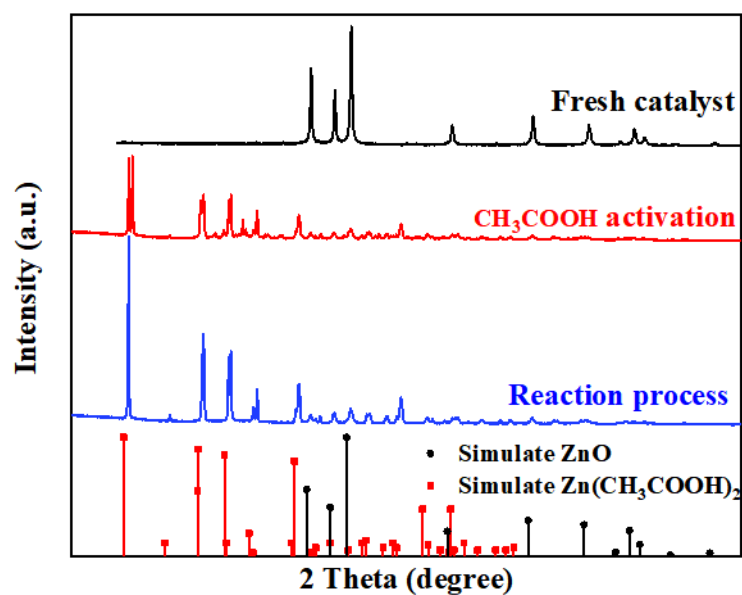**Figure S4.** XRD patterns in each reaction stage of Zn-O-C catalyst.

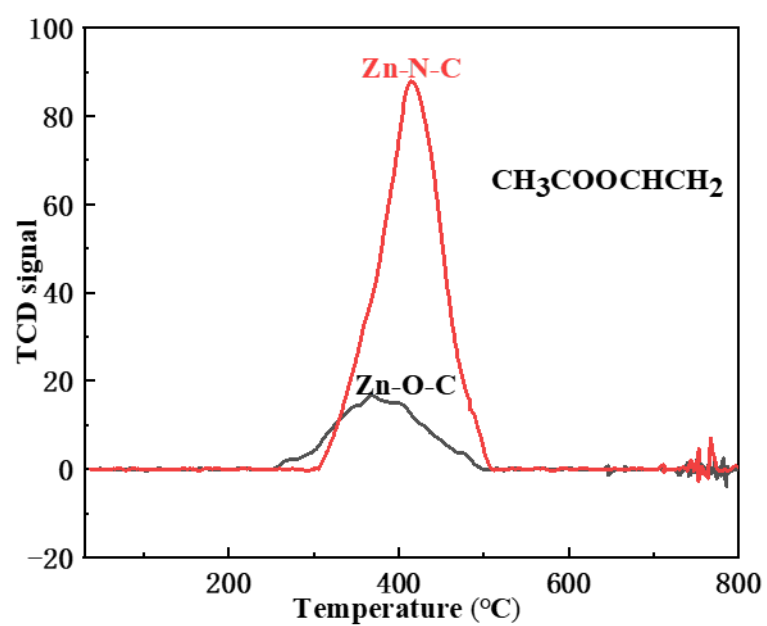

Figure S5. TPD analysis of Zn-O-C and Zn-N-C catalysts for  $\text{CH}_3\text{COOCHCH}_2$ .
